# Supplementary material
Source: PubMed Central journal article supplement (PMC1964857)
Supplement: pnas_0704342104_1.pdf [file pnas_0704342104_1.pdf]

## SI Text

### 1. Analysis Parameters for 1.4 Mb data set including all taxa.

#### Maximum Likelihood Settings and Results in PAUP\* Analysis:

Heuristic search settings:

Optimality criterion = likelihood

Likelihood settings:

User-specified substitution rate matrix =

|          |          |          |          |  |
|----------|----------|----------|----------|--|
| -        | 1.578600 | 4.270300 | 1.035200 |  |
| 1.578600 | -        | 1.335800 | 7.055100 |  |
| 4.270300 | 1.335800 | -        | 1.000000 |  |
| 1.035200 | 7.055100 | 1.000000 | -        |  |

Assumed nucleotide frequencies (set by user):

A=0.27630 C=0.24200 G=0.25440 T=0.22730

Among-site rate variation:

Assumed proportion of invariable sites = 0.3082

Distribution of rates at variable sites = gamma (discrete approximation)

Shape parameter (alpha) = 0.6954

Number of rate categories = 4

Representation of average rate for each category = mean

These settings correspond to the GTR+G+I model

Number of distinct data patterns under this model = 129151

Molecular clock not enforced

Starting branch lengths obtained using Rogers-Swofford approximation method

Trees with approximate likelihoods 5% or further from the target score are rejected without additional iteration

Branch-length optimization = one-dimensional Newton-Raphson with pass limit=20, delta=1e-06

-ln L (unconstrained) = unavailable due to missing-data and/or ambiguities

Starting tree(s) obtained via stepwise addition

Addition sequence: random

Number of replicates = 10

Starting seed = 107388993

Number of trees held at each step during stepwise addition = 1

Branch-swapping algorithm: tree-bisection-reconnection (TBR)

Steepest descent option not in effect

Initial 'MaxTrees' setting = 100 (will be auto-increased by 100)

Branches collapsed (creating polytomies) if branch length is less than or equal to 1e-08

'MulTrees' option in effect

Topological constraints not enforced  
Trees are unrooted

Heuristic search completed

Total number of rearrangements tried = 864  
Score of best tree(s) found = 7238023.8075  
Number of trees retained = 1  
Time used = 17:27:16 (CPU time = 17:22:22.5)

]

Translate

1 human,  
2 chimp,  
3 macac,  
4 mouse,  
5 rat,  
6 rabbi,  
7 dog,  
8 cow,  
9 armad,  
10 eleph,  
11 tenre,  
12 chick,  
13 oposs,  
14 xenop  
;

tree PAUP\_1 = [&U]

(((((1:0.003866,2:0.005885):0.008017,3:0.019001):0.026805,((4:0.024971,5:0.027735):0.064416,6:0.070669):0.007313):0.004378,(7:0.039901,8:0.053906):0.008360):0.006063,(9:0.069935,(10:0.053480,11:0.082869):0.012225):0.004323):0.060321,13:0.113324):0.065272,12:0.138760):0.315434,14:0);  
End;

### Maximum Likelihood Settings and Results using PhyML:

Sequence file : mam

. Data set : #1  
. Random init tree : #6  
. Tree search : SPRs. Initial tree : random tree  
. Model of nucleotides substitution : GTR  
. Number of taxa : 14  
. Log-likelihood : -7240210.13026  
. Discrete gamma model : Yes  
- Number of categories : 4  
- Gamma shape parameter : 0.509  
. Proportion of invariant : 0.238  
. Nucleotides frequencies :  
- f(A)= 0.27787

- f(C)= 0.23831  
- f(G)= 0.25616  
- f(T)= 0.22766

. GTR relative rate parameters :

A <-> C 1.59449  
A <-> G 4.25481  
A <-> T 1.03899  
C <-> G 1.35391  
C <-> T 7.12648  
G <-> T 1.0 (fixed)

. Instantaneous rate matrix :

```
[A-----C-----G-----T-----]
-0.85171 0.18965 0.54400 0.11806
0.22114 -1.20401 0.17310 0.80976
0.59011 0.16104 -0.86477 0.11363
0.14410 0.84765 0.12786 -1.11960
```

eg., the instantaneous rate of change from 'C' to 'A' is  $0.27787 \times 1.59449 = 0.22114$

Best tree:

```
(chick:0.137602,xenop:0.312338,(oposs:0.112620,((armad:0.069778,(elep
h:0.053398,tenre:0.082550)0.000000:0.012258)1.000000:0.004339,((dog:0
.039896,cow:0.053829)0.022000:0.008402,((macac:0.019032,(human:0.0038
80,chimp:0.005904)1.000000:0.008052)1.000000:0.026849,(rabbi:0.070415
,(mouse:0.025000,rat:0.027752)1.000000:0.064160)0.000000:0.007399)1.0
00000:0.004417)0.850000:0.006130)0.000000:0.060095)0.997000:0.064592)
;
```

### Maximum Parsimony Settings and Results using PAUP\*:

Character-exclusion status changed:

481275 characters excluded

Total number of characters now excluded = 481275

Number of included characters = 962550

Heuristic search settings:

Optimality criterion = parsimony

Character-status summary:

481275 characters are excluded

Of the remaining 962550 included characters:

All characters are of type 'unord'  
 All characters have equal weight  
 779508 characters are constant  
 118838 variable characters are parsimony-uninformative  
 Number of (included) parsimony-informative characters = 64204  
 Gaps are treated as "missing"  
 Multistate taxa interpreted as uncertainty  
 Starting tree(s) obtained via stepwise addition  
 Addition sequence: random  
 Number of replicates = 100  
 Starting seed = 187994677  
 Number of trees held at each step during stepwise addition = 1  
 Branch-swapping algorithm: tree-bisection-reconnection (TBR)  
 Steepest descent option not in effect  
 Initial 'MaxTrees' setting = 100  
 Branches collapsed (creating polytomies) if maximum branch length is zero  
 'MulTrees' option in effect  
 Topological constraints not enforced  
 Trees are unrooted

Heuristic search completed

Total number of rearrangements tried = 76731  
 Score of best tree(s) found = 267158  
 Number of trees retained = 1  
 Time used = 52.50 sec

Tree-island profile:

| Times<br>Island<br>hit | Size | First<br>tree | Last<br>tree | Score  | First<br>replicate |
|------------------------|------|---------------|--------------|--------|--------------------|
| 1                      | 1    | 1             | 1            | 267158 | 1                  |

Tree number 1 (rooted using user-specified outgroup)

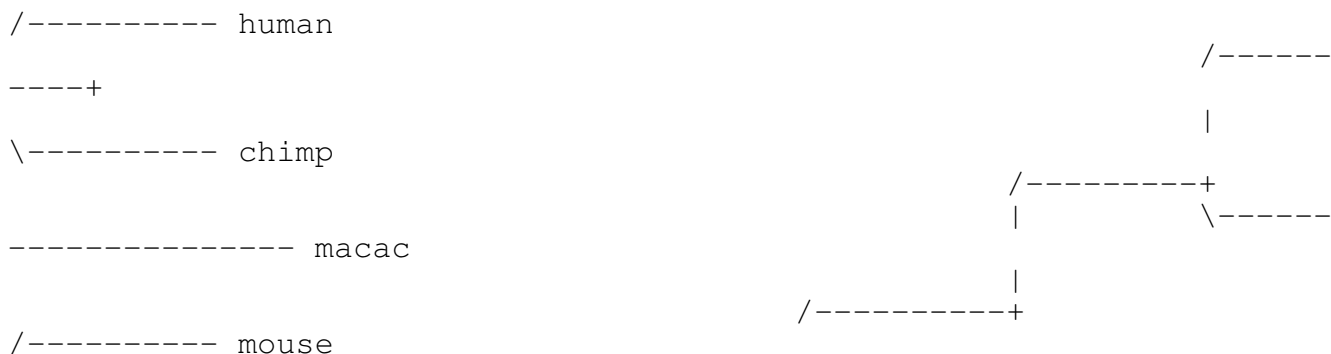

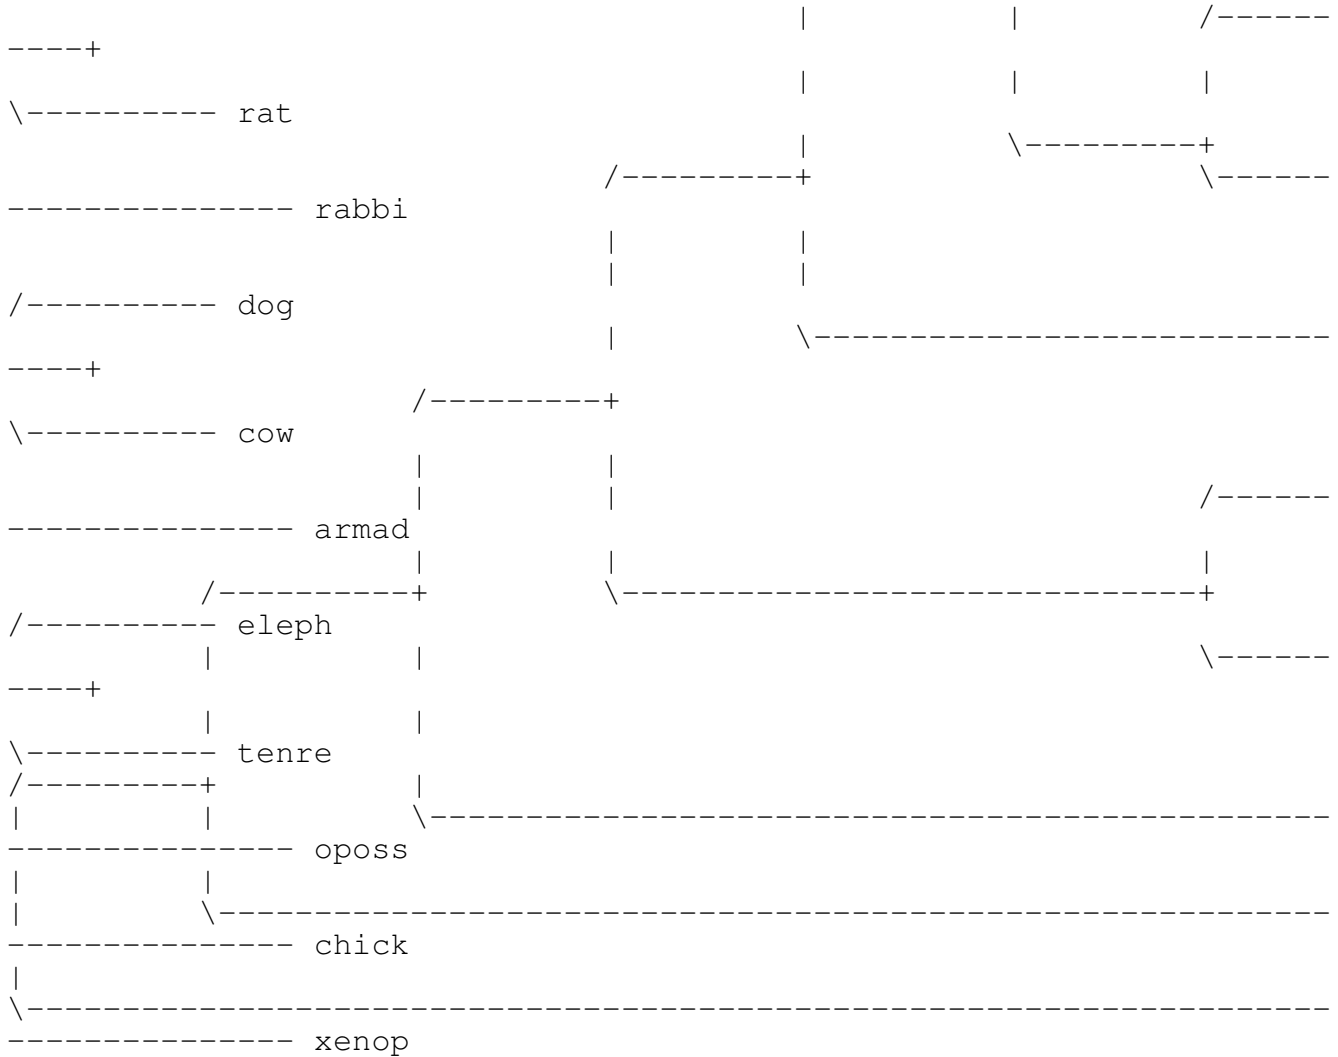

**Bootstrap method with heuristic search:**

Number of bootstrap replicates = 1000

Starting seed = 819785654

Optimality criterion = parsimony

Character-status summary:

481275 characters are excluded

Of the remaining 962550 included characters:

All characters are of type 'unord'

All characters have equal weight

779508 characters are constant

118838 variable characters are parsimony-uninformative

Number of (included) parsimony-informative characters = 64204

Gaps are treated as "missing"

Multistate taxa interpreted as uncertainty

Starting tree(s) obtained via stepwise addition

Addition sequence: random



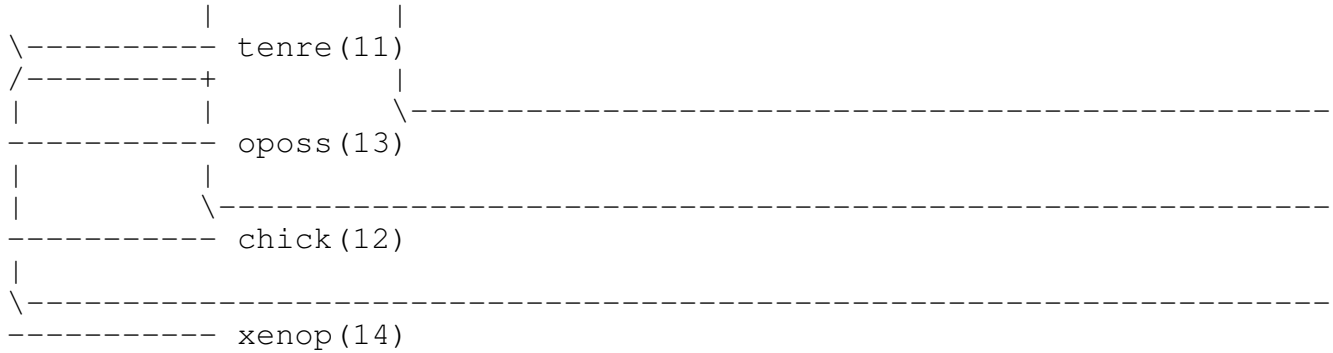

Bipartitions found in one or more trees and frequency of occurrence (bootstrap support values) :

| 12345678901234 | 1 1 | Freq | %      |
|----------------|-----|------|--------|
| .....*.*       |     | 1000 | 100.0% |
| .....***       |     | 1000 | 100.0% |
| .....**...     |     | 1000 | 100.0% |
| ....**.....    |     | 1000 | 100.0% |
| .....*****     |     | 1000 | 100.0% |
| .....**.....   |     | 1000 | 100.0% |
| .....*****     |     | 1000 | 100.0% |
| ....***.....   |     | 1000 | 100.0% |
| ....*****      |     | 1000 | 100.0% |
| ..*****        |     | 1000 | 100.0% |
| .....***...    |     | 953  | 95.3%  |

**Bayesian Analysis Settings**

Parameters were set according to the MrBayes manual. We used the following command block to direct the MrBayes analysis:

```
begin mrbayes;
  set autoclose=yes nowarn=yes;
  lset nst=6 rates=invgamma; prset revmatpr=dirichlet (1,1,1,1,1,1)
  statefreqpr=dirichlet(1,1,1,1) shapepr=uniform(0.1,50)
  pinvarpr=uniform(0,1);
  mcmc ngen=1000000 samplefreq=1000 nchains=4 savebrlens=yes file=mammals.nxs;
end;
```

## **2. Additional Analyses**



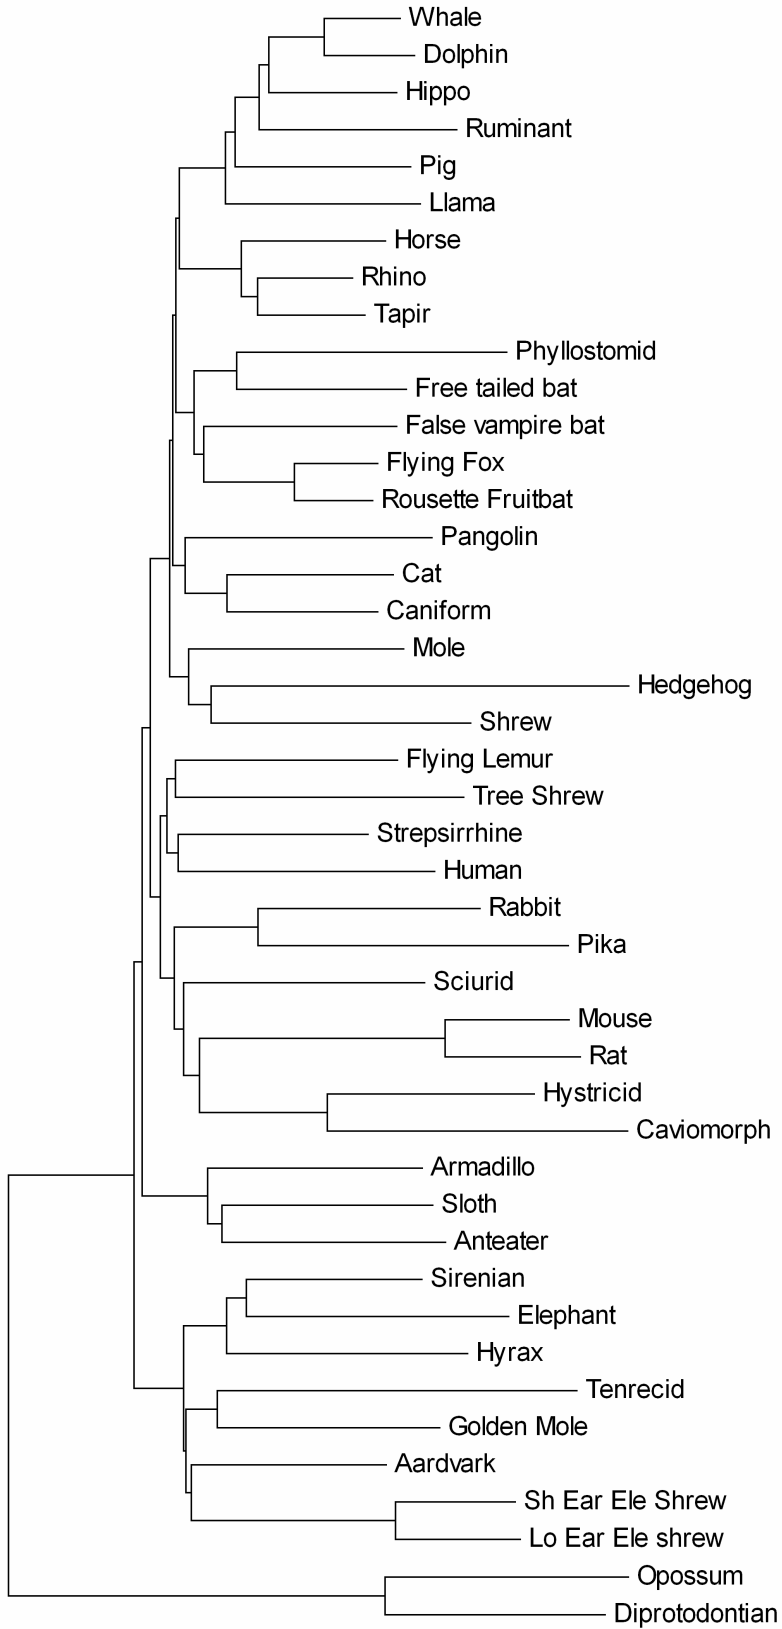

*Figure S1.* Evolutionary relationships of 44 taxa using the Murphy et al. dataset [1].

The evolutionary history was inferred using the Neighbor-Joining method [2]. The optimal tree with the sum of branch length = 2.22771052 is shown. The tree is drawn to scale, with branch lengths in the same units as those of the evolutionary distances used to infer the phylogenetic tree. The evolutionary distances were computed using the Maximum Composite Likelihood method [3] and are in the units of the number of base substitutions per site. Codon positions included were 1st+2nd+3rd. All positions containing gaps and missing data were eliminated from the dataset (Complete deletion option). There were a total of 3180 positions in the final dataset. Phylogenetic analyses were conducted in MEGA4 [4].

1. Murphy WJ, Eizirik E, O'Brien SJ, Madsen O, Scally M, Douady CJ, Teeling E, Ryder OA, Stanhope MJ, de Jong WW, Springer MS (2001) Resolution of the early placental mammal radiation using Bayesian phylogenetics. *Science* 294:2348-2351.
2. Saitou N & Nei M (1987) The neighbor-joining method: A new method for reconstructing phylogenetic trees. *Molecular Biology and Evolution* 4:406-425.
3. Tamura, K., Nei, M. & Kumar S. (2004) Prospects for inferring very large phylogenies by using the neighbor-joining method. *PNAS* 101:11030-11035.
4. Tamura K, Dudley J, Nei M & Kumar S (2007) MEGA4: Molecular Evolutionary Genetics Analysis (MEGA) software version 4.0. *Molecular Biology and Evolution* 10.1093/molbev/msm092.

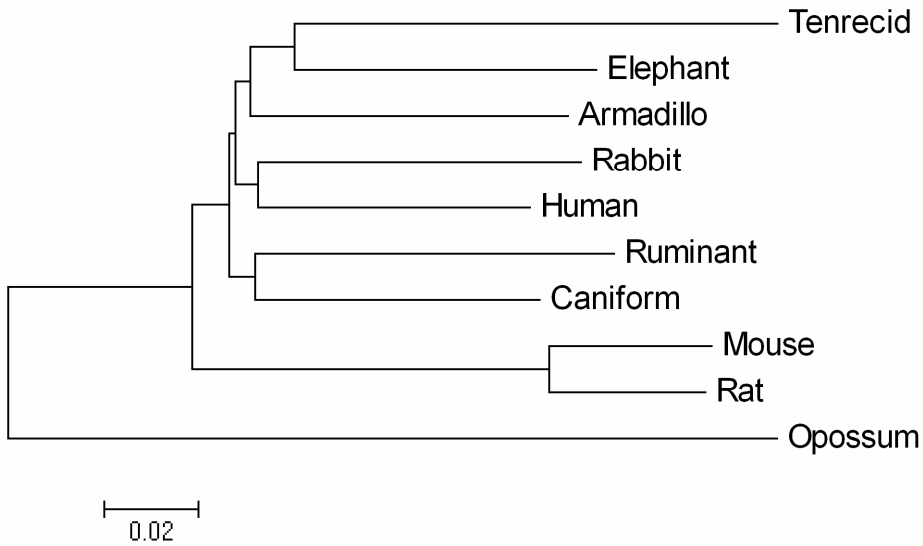

*Figure S2.* Evolutionary relationships of the 10 taxa from the Murphy et al [1] dataset that are also represented in this study.

The evolutionary history was inferred using the Neighbor-Joining method [2]. The optimal tree with the sum of branch length = 0.87295519 is shown. The tree is drawn to scale, with branch lengths in the same units as those of the evolutionary distances used to infer the phylogenetic tree. The evolutionary distances were computed using the Maximum Composite Likelihood method [3] and are in the units of the number of base substitutions per site. Codon positions included were 1st+2nd+3rd. All positions containing gaps and missing data were eliminated from the dataset (Complete deletion option). There were a total of 10190 positions in the final dataset. Phylogenetic analyses were conducted in MEGA4 [4].

1. Murphy WJ, Eizirik E, O'Brien SJ, Madsen O, Scally M, Douady CJ, Teeling E, Ryder OA, Stanhope MJ, de Jong WW, Springer MS (2001) Resolution of the early placental mammal radiation using Bayesian phylogenetics. *Science* 294:2348-2351.
2. Saitou N & Nei M (1987) The neighbor-joining method: A new method for reconstructing phylogenetic trees. *Molecular Biology and Evolution* 4:406-425.
3. Tamura, K., Nei, M. & Kumar S. (2004) Prospects for inferring very large phylogenies by using the neighbor-joining method. *PNAS* 101:11030-11035.
4. Tamura K, Dudley J, Nei M & Kumar S (2007) MEGA4: Molecular Evolutionary Genetics Analysis (MEGA) software version 4.0. *Molecular Biology and Evolution* 10.1093/molbev/msm092.

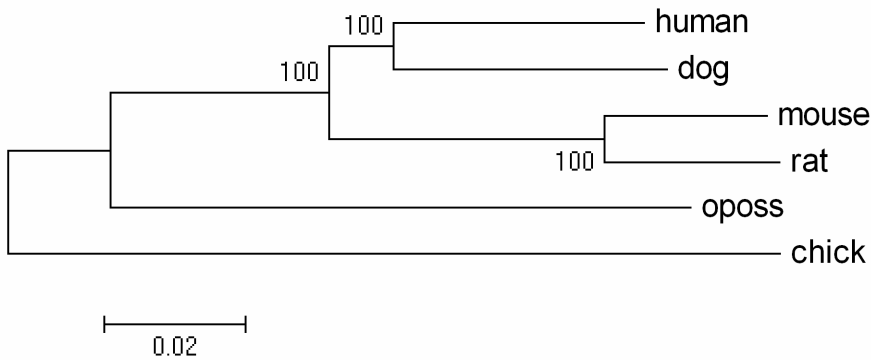

*Figure S3.* Evolutionary relationships of the 6 taxa from the current study's dataset that overlap with those of Huttley et al [1], inferred using the Neighbor-Joining method [2].

The optimal tree with the sum of branch length = 0.40734661 is shown. The percentage of replicate trees in which the associated taxa clustered together in the bootstrap test (1000 replicates) are shown next to the branches [3]. The tree is drawn to scale, with branch lengths in the same units as those of the evolutionary distances used to infer the phylogenetic tree. The evolutionary distances were computed using the Maximum Composite Likelihood method [4] and are in the units of the number of base substitutions per site. Codon positions included were 1st+2nd+3rd. All positions containing gaps and missing data were eliminated from the dataset (Complete deletion option). There were a total of 1340243 positions in the final dataset. Phylogenetic analyses were conducted in MEGA4 [5].

1. Huttley GA, Wakefield MJ, Easteal S. (2007) Rates of Genome Evolution and Branching Order from Whole Genome Analysis. *Molecular Biology and Evolution*. May 9; [Epub ahead of print].
2. Saitou N & Nei M (1987) The neighbor-joining method: A new method for reconstructing phylogenetic trees. *Molecular Biology and Evolution* 4:406-425.
3. Felsenstein J (1985) Confidence limits on phylogenies: An approach using the bootstrap. *Evolution* 39:783-791.
4. Tamura, K., Nei, M. & Kumar S. (2004) Prospects for inferring very large phylogenies by using the neighbor-joining method. *PNAS* 101:11030-11035.
5. Tamura K, Dudley J, Nei M & Kumar S (2007) MEGA4: Molecular Evolutionary Genetics Analysis (MEGA) software version 4.0. *Molecular Biology and Evolution* 10.1093/molbev/msm092.

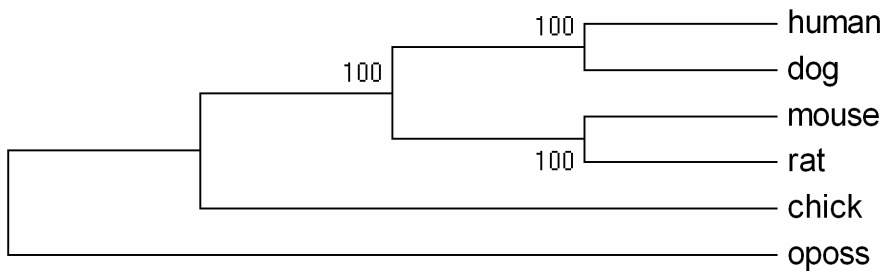

*Figure S4.* Evolutionary relationships of the 6 taxa from the current study's dataset that overlap with those of Huttley et al [1], inferred using the Maximum Parsimony method [2].

The most parsimonious tree with length = 104247 is shown. The consistency index is (0.751765), the retention index is (0.691242), and the composite index is 0.626678 (0.519652) for all sites and parsimony-informative sites (in parentheses). The percentage of replicate trees in which the associated taxa clustered together in the bootstrap test (1000 replicates) are shown next to the branches [3]. The MP tree was obtained using the Close-Neighbor-Interchange algorithm [4, pg. 128] with search level 3 [3, 4] in which the initial trees were obtained with the random addition of sequences (10 replicates). The codon positions included were 1st+2nd. All positions containing gaps and missing data were eliminated from the dataset (Complete Deletion option). There were a total of 893526 positions in the final dataset, out of which 26717 were parsimony informative. Phylogenetic analyses were conducted in MEGA4 [5].

1. Huttley GA, Wakefield MJ, Eastal S. (2007) Rates of Genome Evolution and Branching Order from Whole Genome Analysis. *Molecular Biology and Evolution*. May 9; [Epub ahead of print].
2. Eck RV & Dayhoff MO (1966) *Atlas of Protein Sequence and Structure*. National Biomedical Research Foundation, Silver Springs, Maryland.
3. Felsenstein J (1985) Confidence limits on phylogenies: An approach using the bootstrap. *Evolution* 39:783-791.
4. Nei M & Kumar S (2000) *Molecular Evolution and Phylogenetics*. Oxford University Press, New York.
5. Tamura K, Dudley J, Nei M & Kumar S (2007) MEGA4: Molecular Evolutionary Genetics Analysis (MEGA) software version 4.0. *Molecular Biology and Evolution* 10.1093/molbev/msm092.

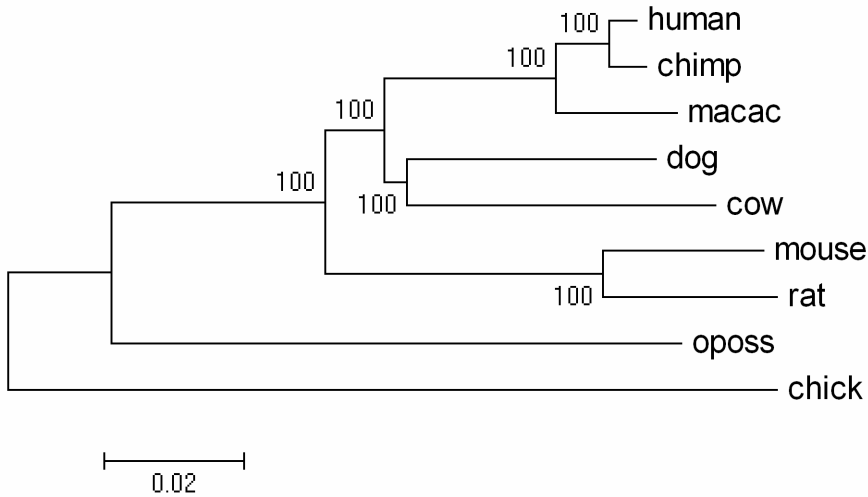

*Figure S5.* Evolutionary history of the 9 taxa from the current study's dataset that overlap with those of Canarozzi et al [1], inferred using the Neighbor-Joining method [2].

The optimal tree with the sum of branch length = 0.47458168 is shown. The percentage of replicate trees in which the associated taxa clustered together in the bootstrap test (1000 replicates) are shown next to the branches [3]. The tree is drawn to scale, with branch lengths in the same units as those of the evolutionary distances used to infer the phylogenetic tree. The evolutionary distances were computed using the Maximum Composite Likelihood method [4] and are in the units of the number of base substitutions per site. Codon positions included were 1st+2nd+3rd. All positions containing gaps and missing data were eliminated from the dataset (Complete deletion option). There were a total of 1309972 positions in the final dataset. Phylogenetic analyses were conducted in MEGA4 [5].

1. Cannarozzi G, Schneider A, Gonnet G (2007) A phylogenomic study of human, dog, and mouse. *PLoS Computational Biology*, 2007 Jan 5;3(1):e2.
2. Saitou N & Nei M (1987) The neighbor-joining method: A new method for reconstructing phylogenetic trees. *Molecular Biology and Evolution* 4:406-425.
3. Felsenstein J (1985) Confidence limits on phylogenies: An approach using the bootstrap. *Evolution* 39:783-791.
4. Tamura, K., Nei, M. & Kumar S. (2004) Prospects for inferring very large phylogenies by using the neighbor-joining method. *PNAS* 101:11030-11035.
5. Tamura K, Dudley J, Nei M & Kumar S (2007) MEGA4: Molecular Evolutionary Genetics Analysis (MEGA) software version 4.0. *Molecular Biology and Evolution* 10.1093/molbev/msm092.

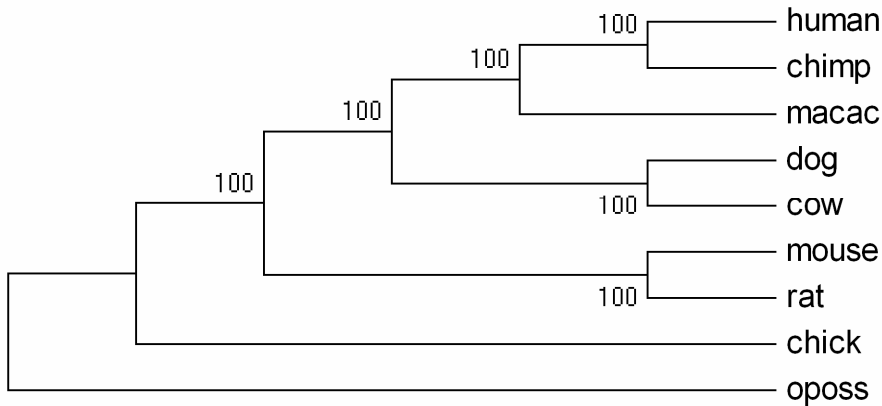

*Figure S6.* Evolutionary relationships of the 9 taxa from the current study's dataset that overlap with those of Canarozzi et al [1], inferred using the Maximum Parsimony method [2].

The most parsimonious tree with length = 123325 is shown. The consistency index is (0.706188), the retention index is (0.684586), and the composite index is 0.596452 (0.483447) for all sites and parsimony-informative sites (in parentheses). The percentage of replicate trees in which the associated taxa clustered together in the bootstrap test (1000 replicates) are shown next to the branches [3]. The MP tree was obtained using the Close-Neighbor-Interchange algorithm [4, pg. 128] with search level 3 [3, 4] in which the initial trees were obtained with the random addition of sequences (10 replicates). The codon positions included were 1st+2nd. All positions containing gaps and missing data were eliminated from the dataset (Complete Deletion option). There were a total of 873346 positions in the final dataset, out of which 33696 were parsimony informative. Phylogenetic analyses were conducted in MEGA4 [5].

1. Cannarozzi G, Schneider A, Gonnet G (2007) A phylogenomic study of human, dog, and mouse. *PLoS Computational Biology*, 2007 Jan 5;3(1):e2.
2. Eck RV & Dayhoff MO (1966) Atlas of Protein Sequence and Structure. National Biomedical Research Foundation, Silver Springs, Maryland.
3. Felsenstein J (1985) Confidence limits on phylogenies: An approach using the bootstrap. *Evolution* 39:783-791.
4. Nei M & Kumar S (2000) *Molecular Evolution and Phylogenetics*. Oxford University Press, New York.
5. Tamura K, Dudley J, Nei M & Kumar S (2007) MEGA4: Molecular Evolutionary Genetics Analysis (MEGA) software version 4.0. *Molecular Biology and Evolution* 10.1093/molbev/msm092.
